# Supplementary material for: CPAP promotes angiogenesis and metastasis by enhancing STAT3 activity
Source: PubMed Central journal article supplement (PMC7206147; doi:10.1038/s41418-019-0413-7), 2019-09-11
Supplement: 41418_2019_413_MOESM1_ESM.pdf [file 41418_2019_413_MOESM1_ESM.pdf]

# Supplementary Figure S1

(A)

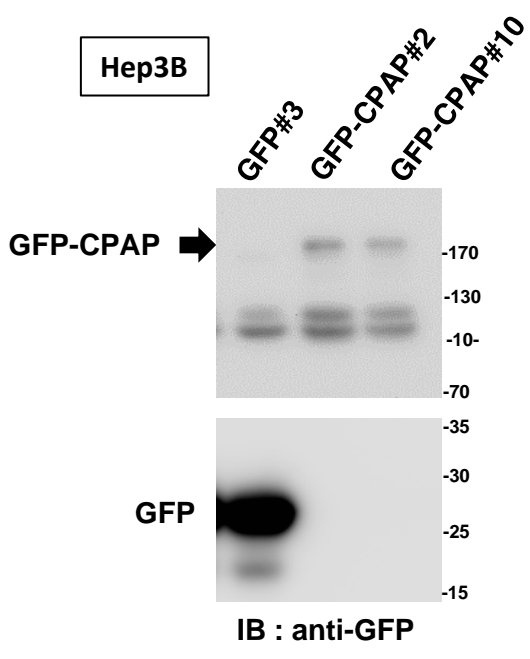

(B)

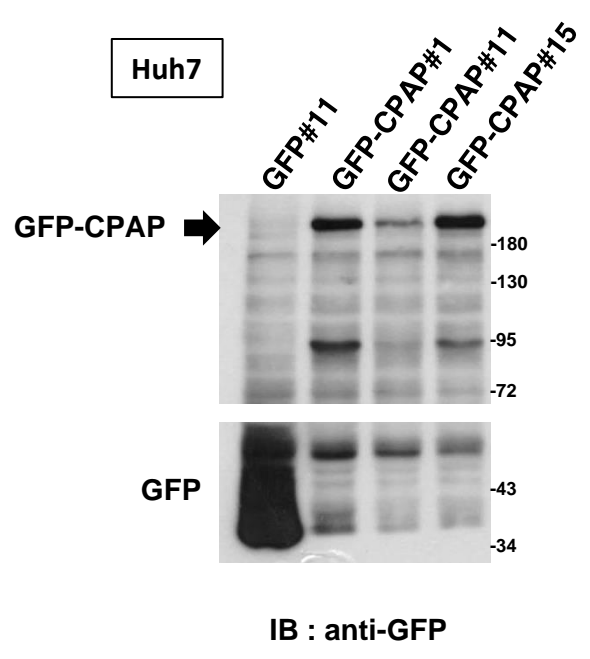

(C)

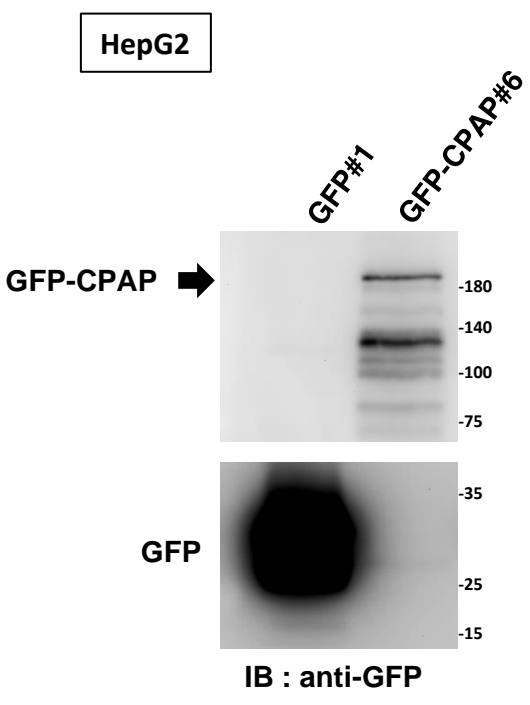

# Supplementary Figure S2

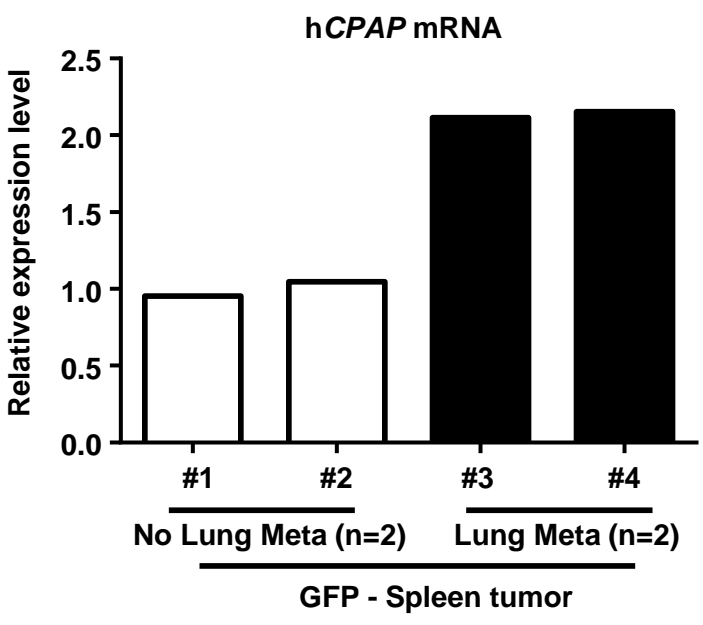

# Supplementary Figure S3

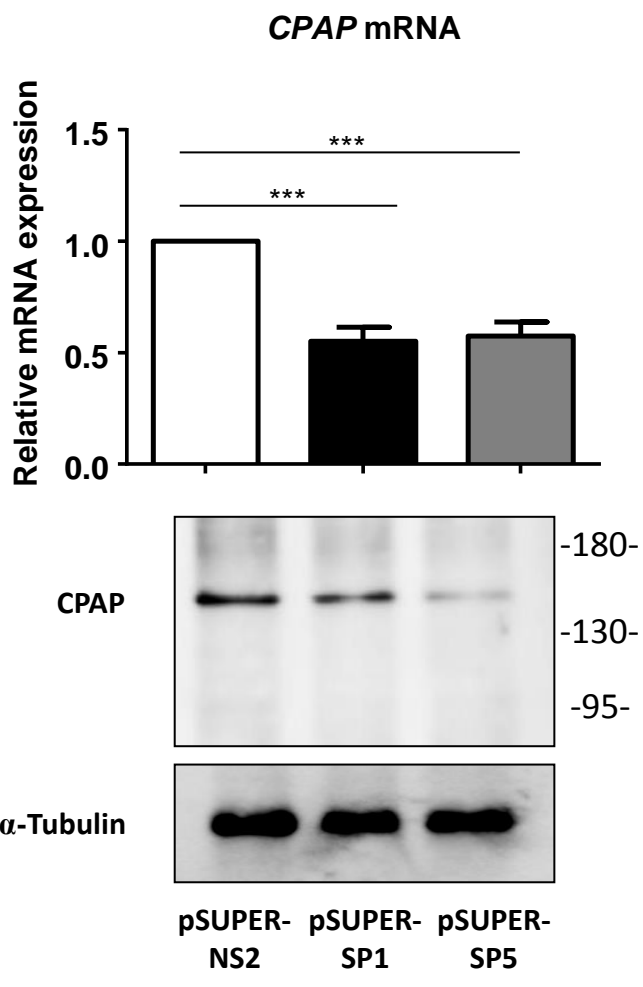

# Supplementary Figure S4

(A)

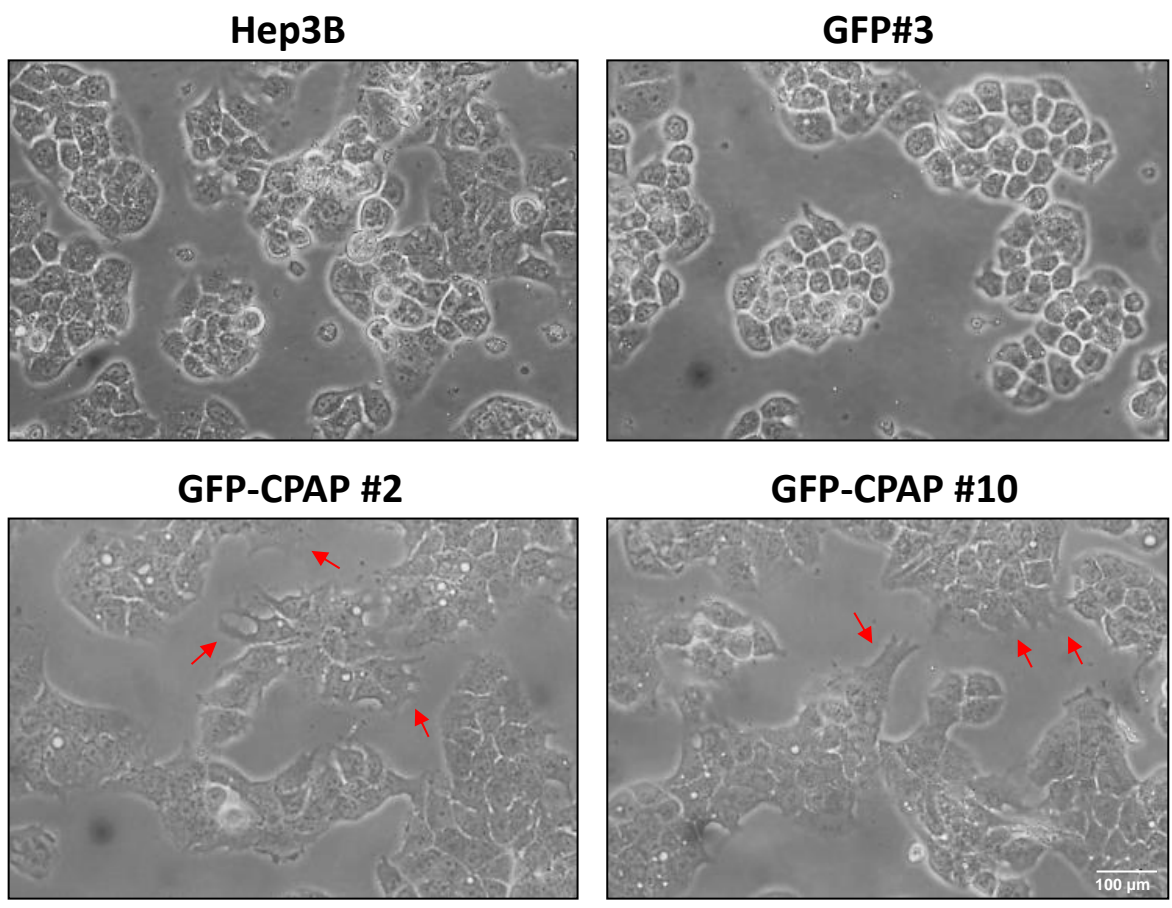

(B)

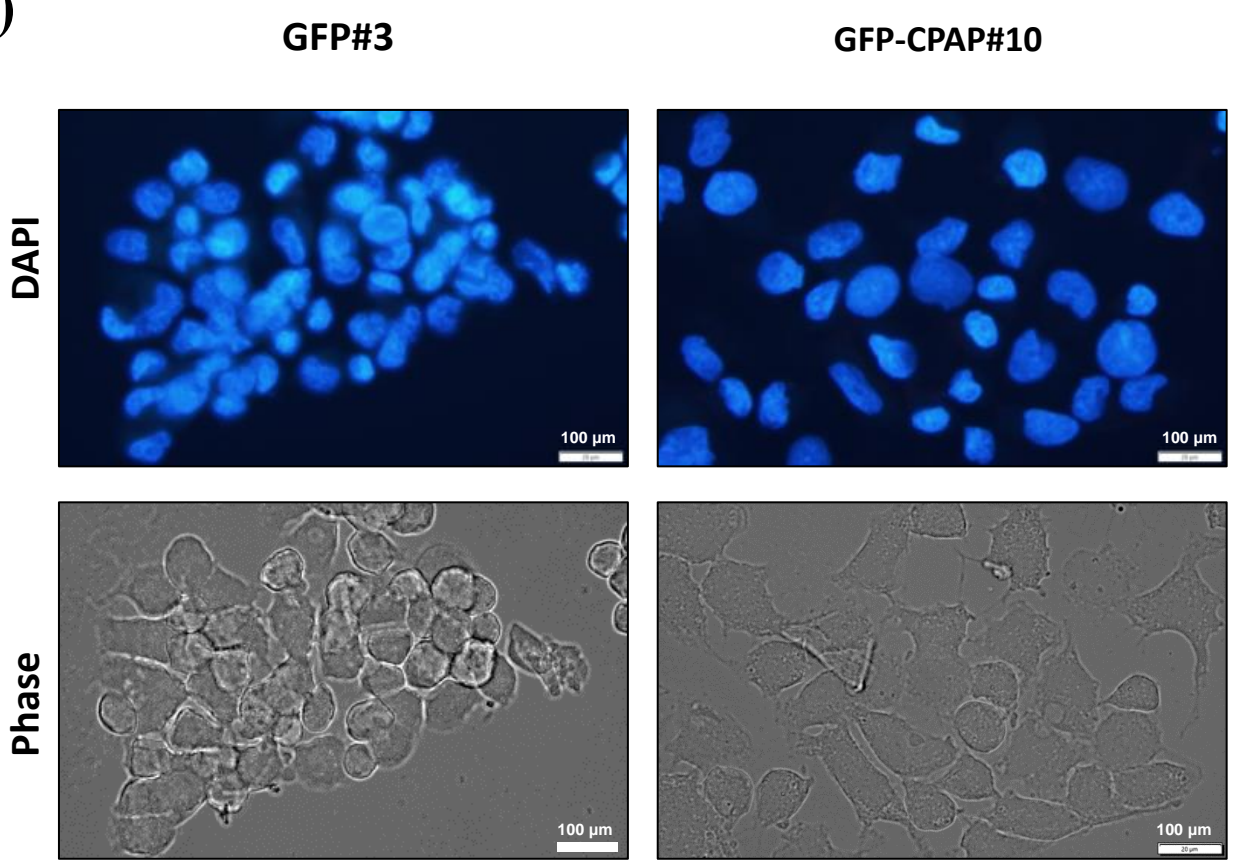

# Supplementary Figure S5

(A)

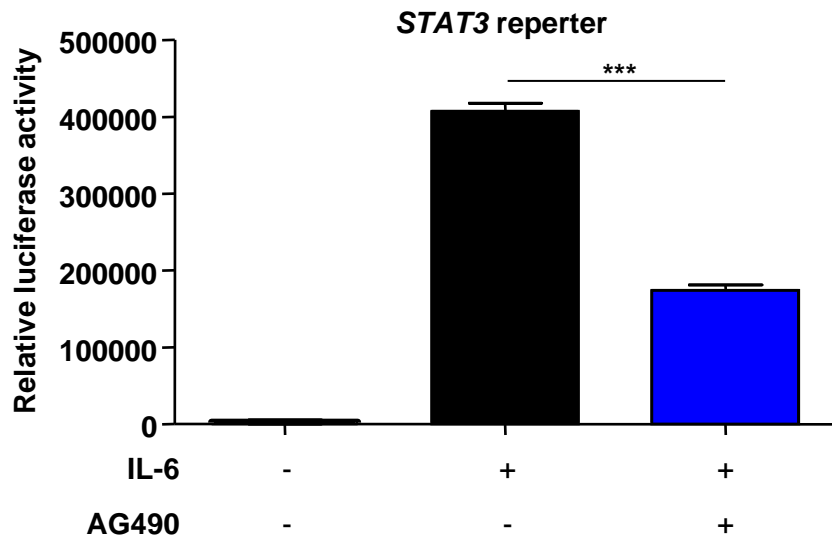

(B)

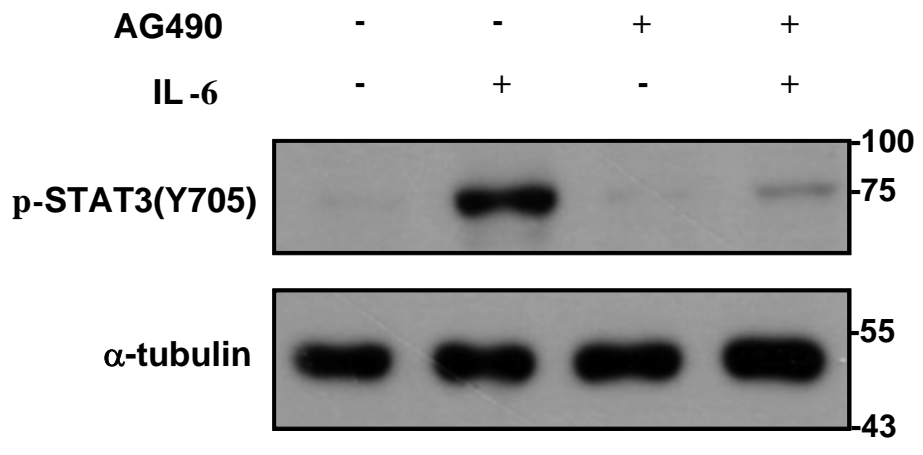

# Supplementary Figure S6

(A)

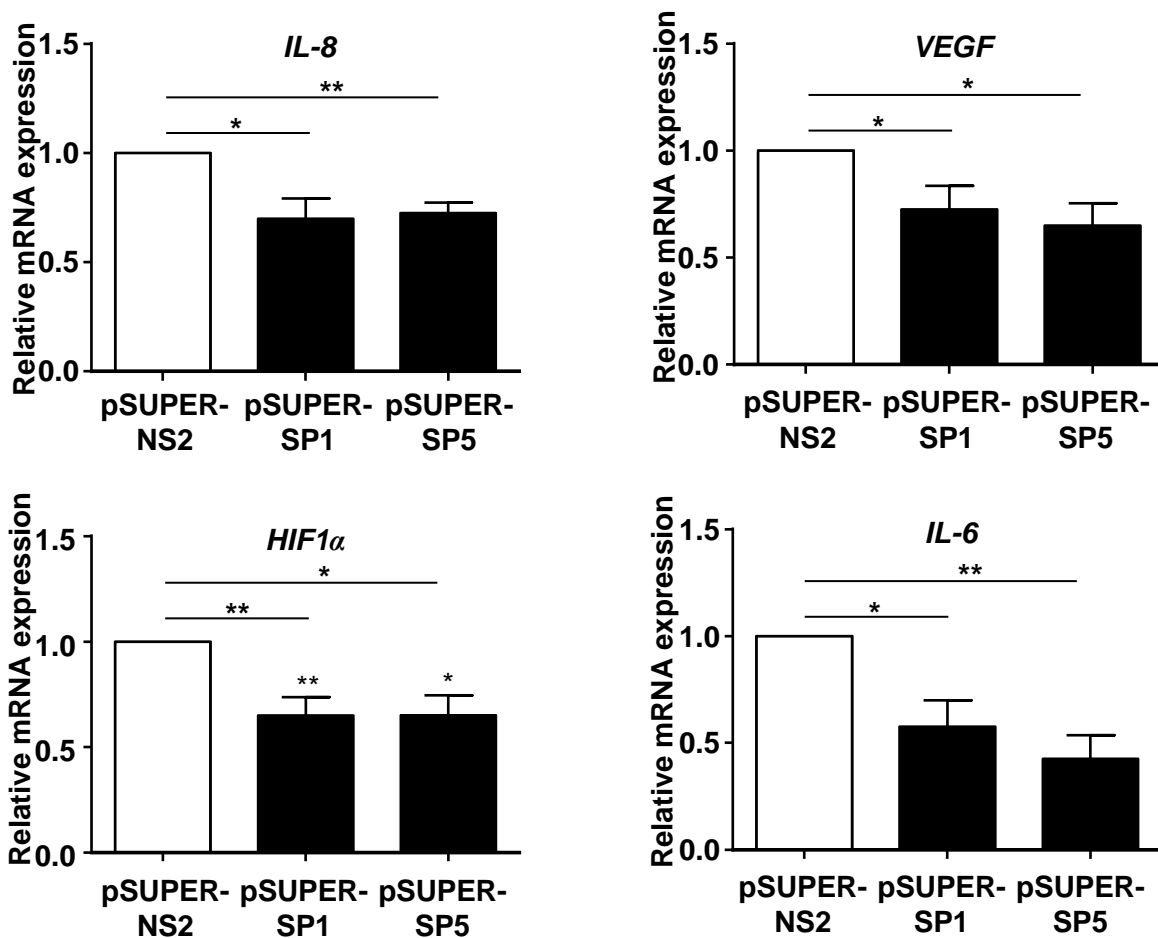

(B)

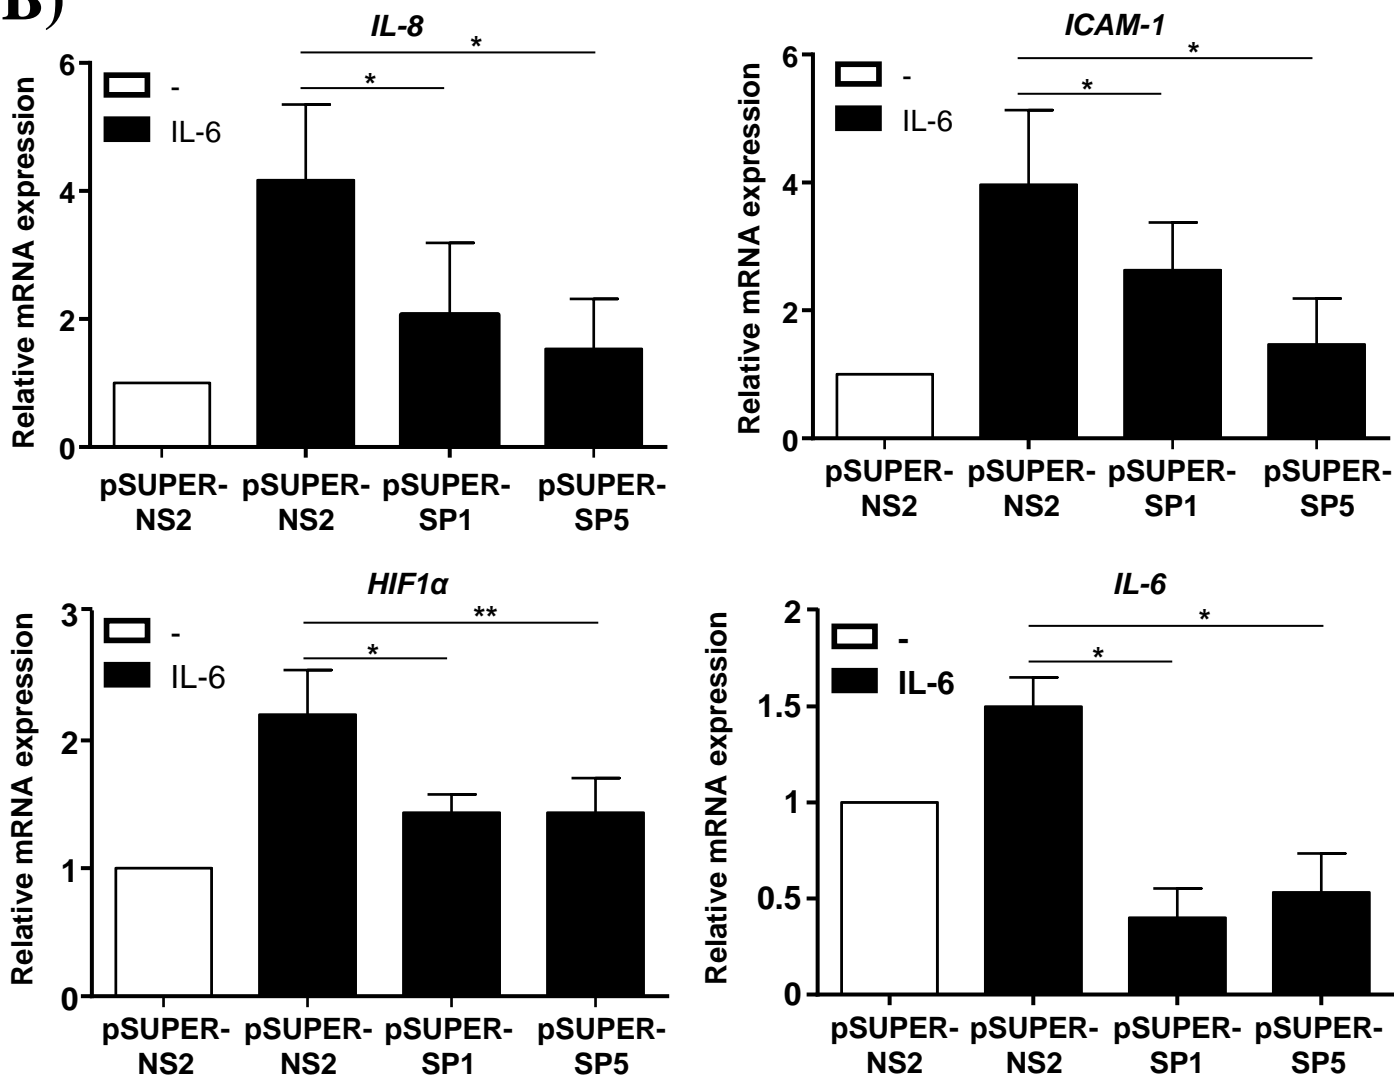

# Supplementary Figure S7

(A)

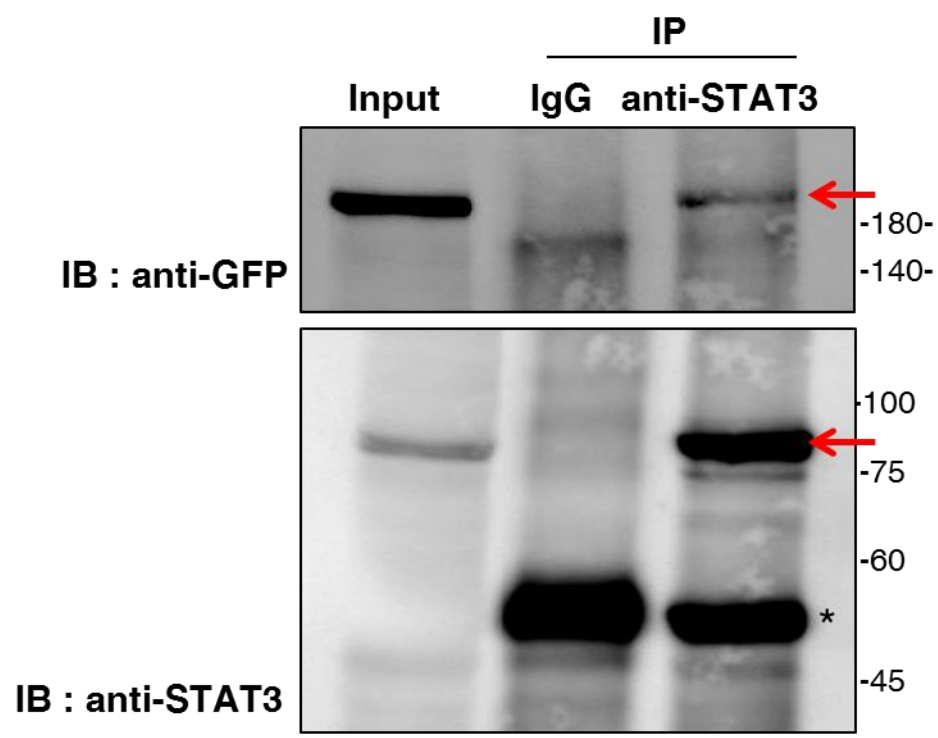

(B)

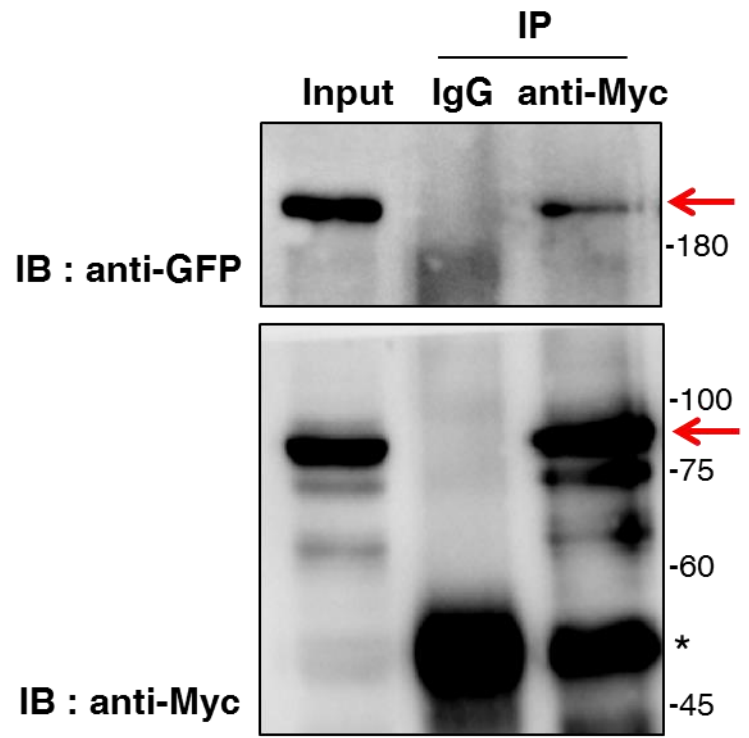

# Supplementary Figure S8

(A)

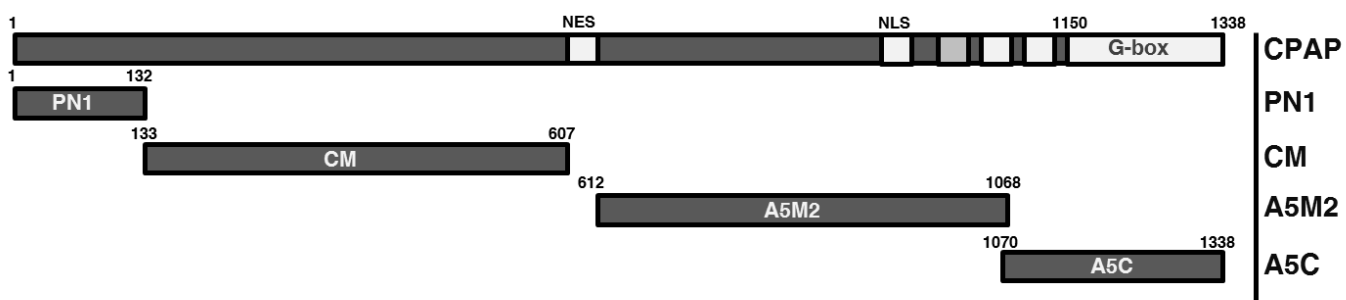

(B)

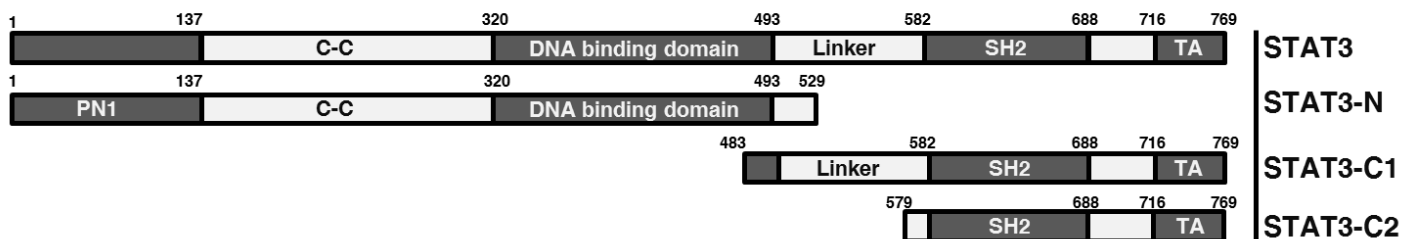

(C)

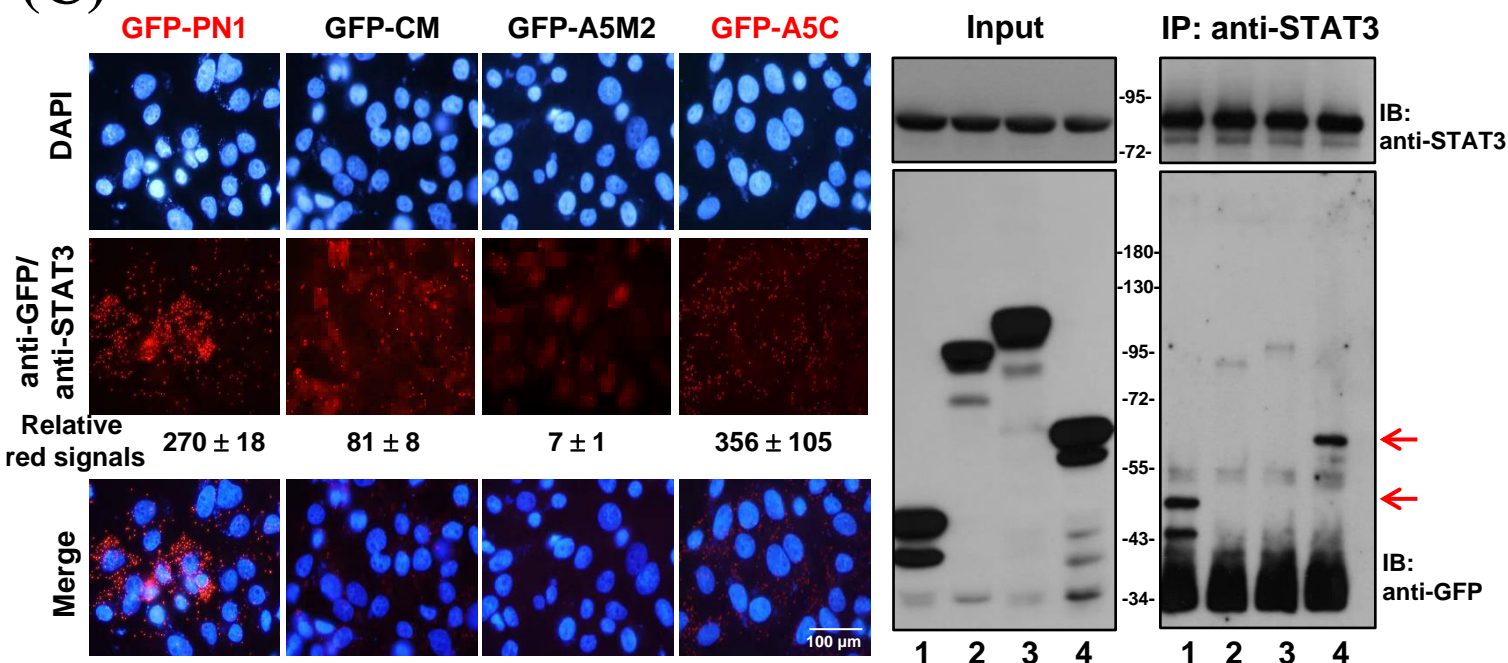

(D)

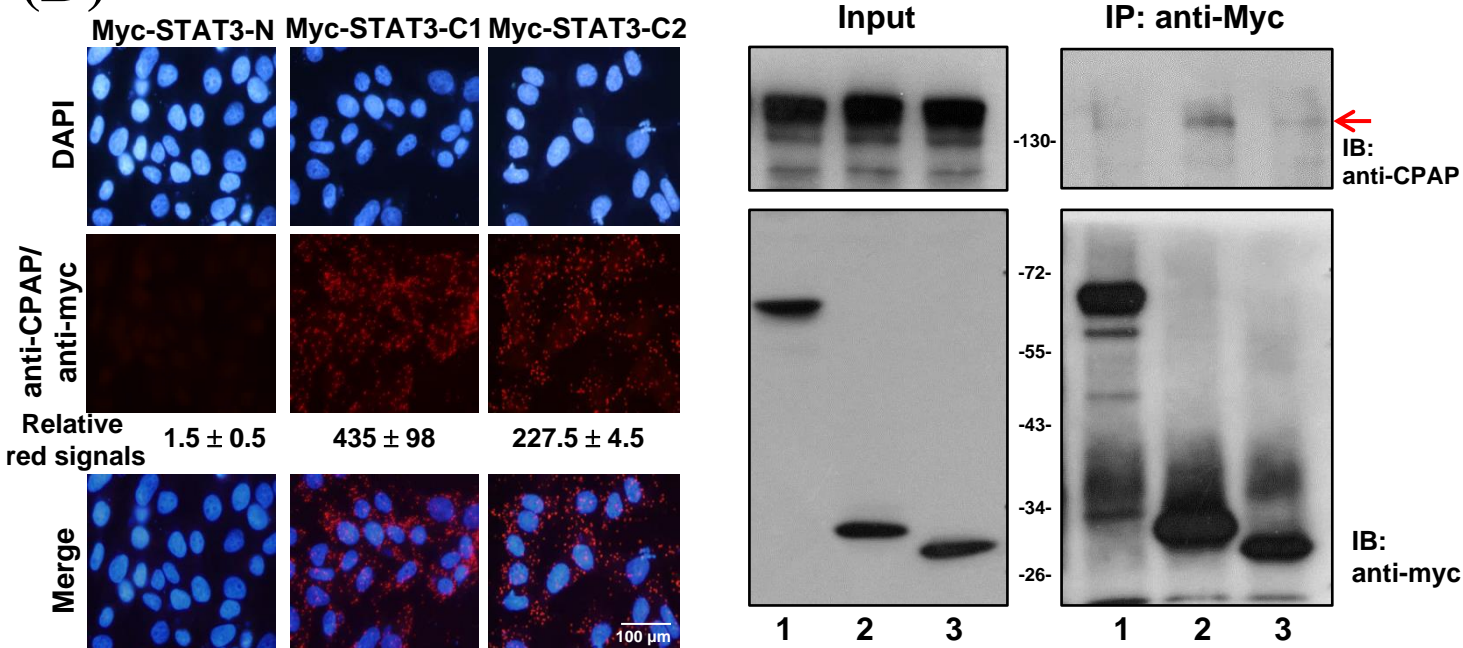



# Supplementary Figure S9

(A)

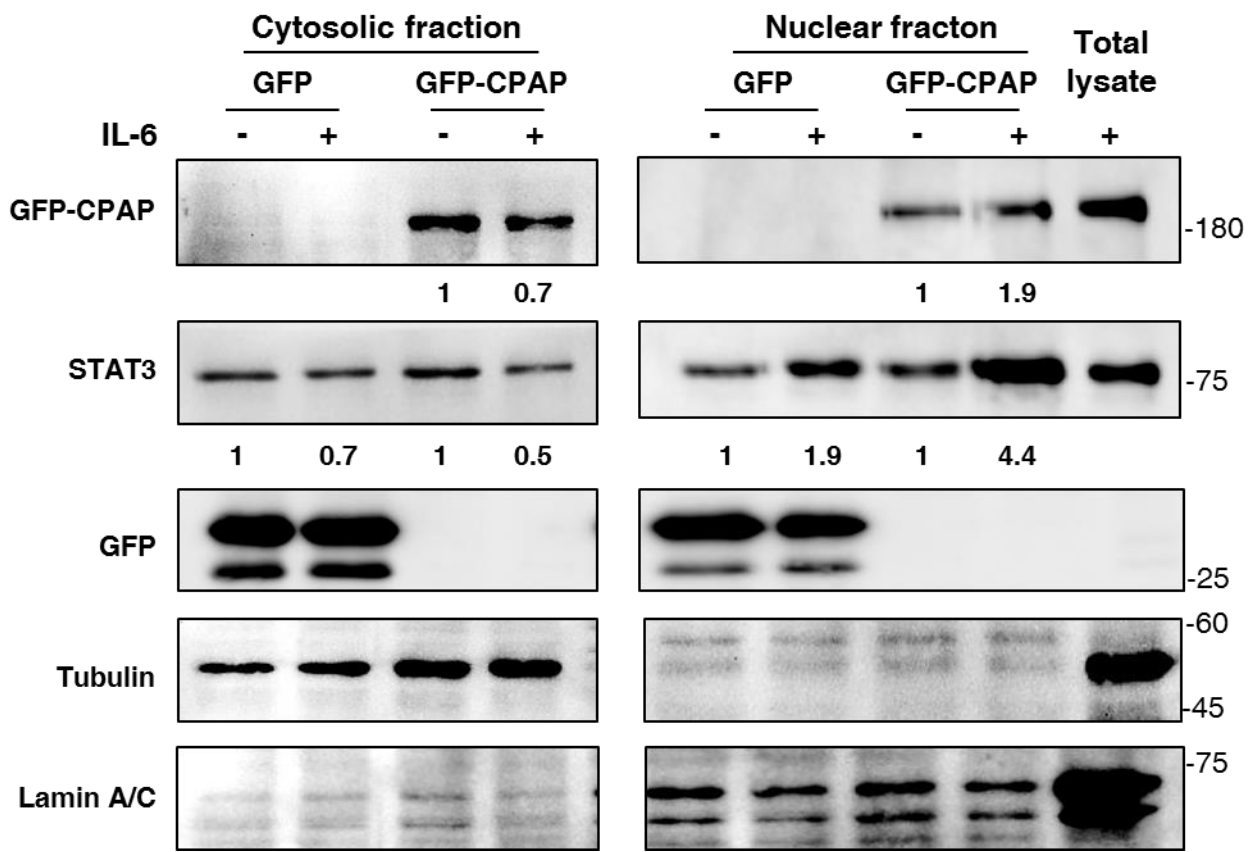

(B)

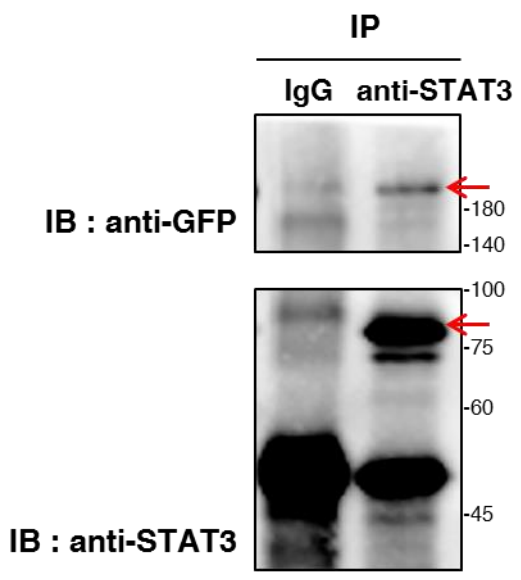

# Supplementary Figure S10

(A)

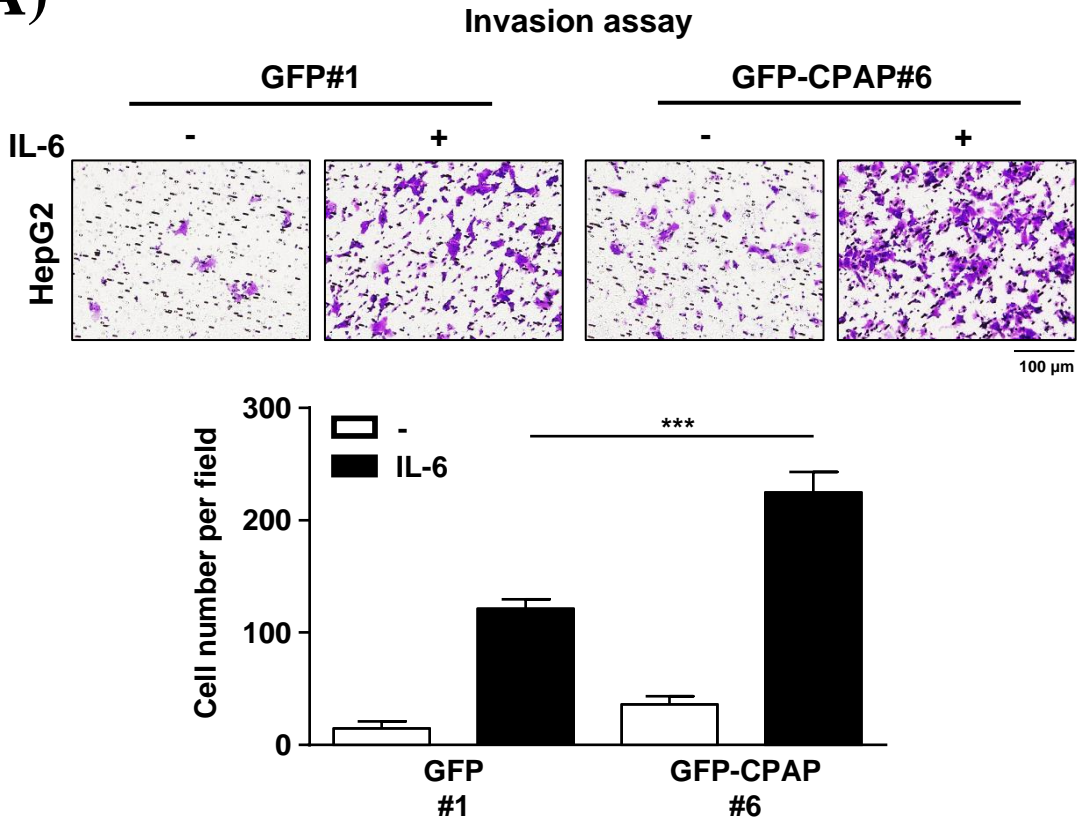

(B)

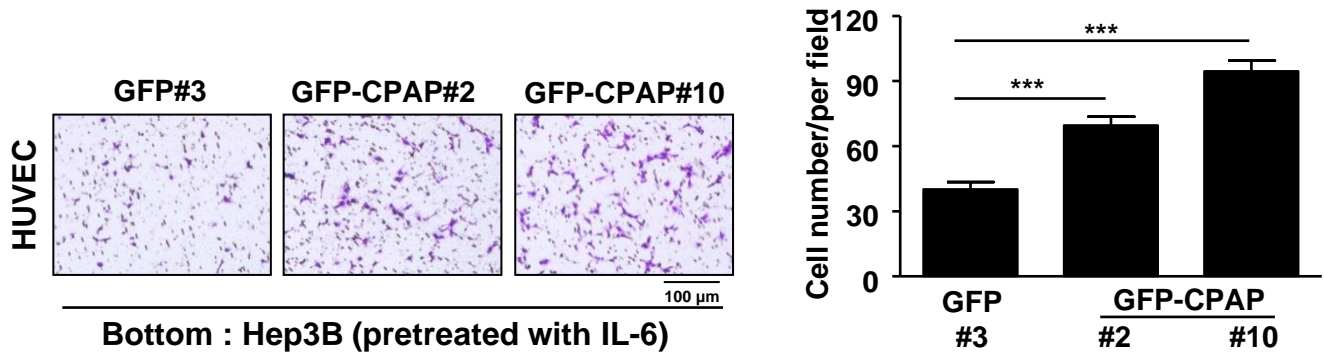

(C)

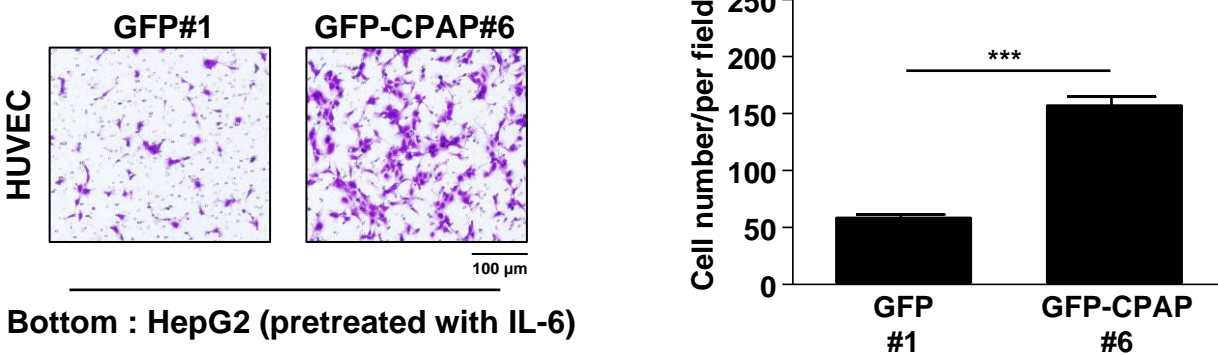

# Supplementary Figure S11

(A)

(i)

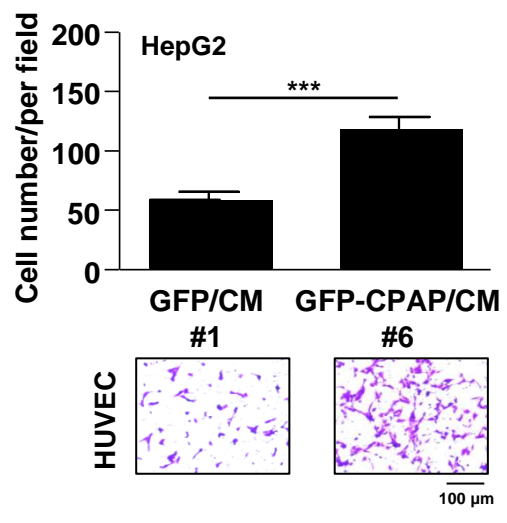

(ii)

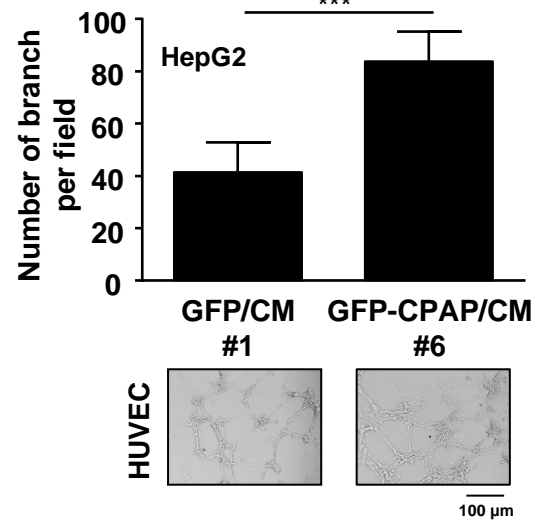

(B)

(i)

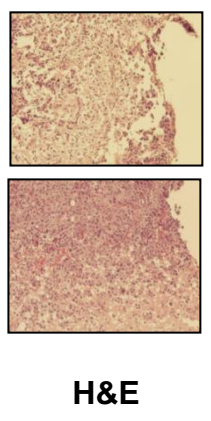

H&E

(ii)

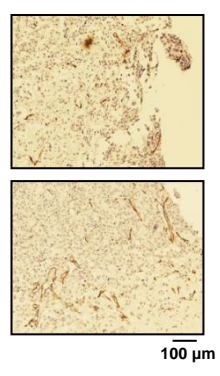

IHC: anti-CD31

(iii)

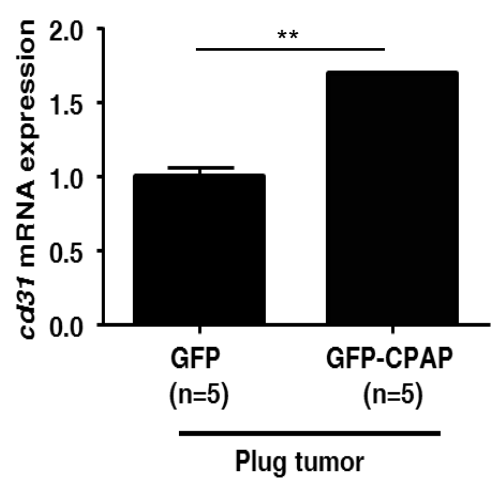

# Supplementary Figure S12

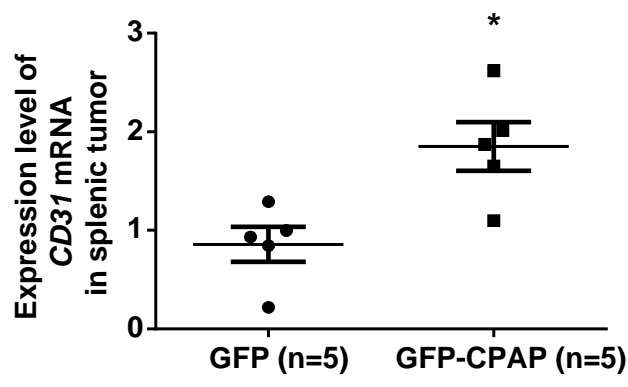

# Supplementary Figure S13

(A)

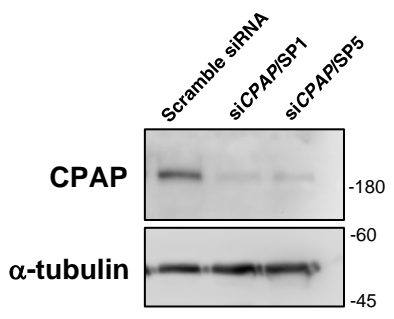

(B)

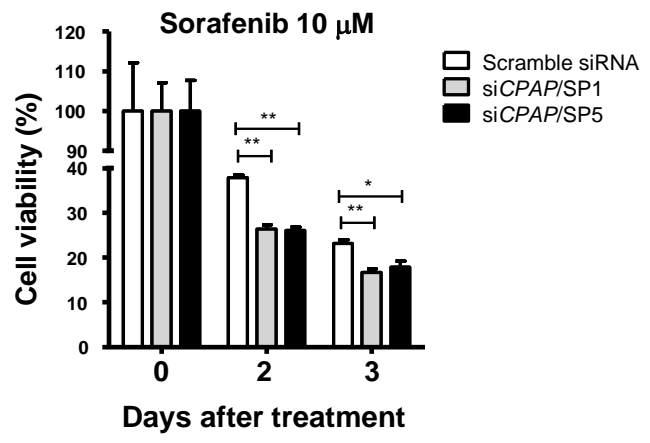

# Supplementary Figure S14

(A)

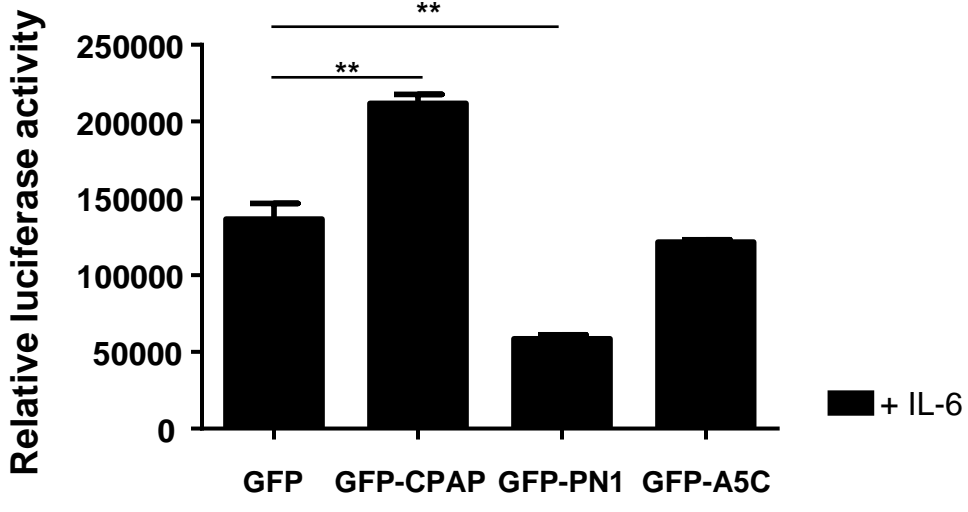

(B)

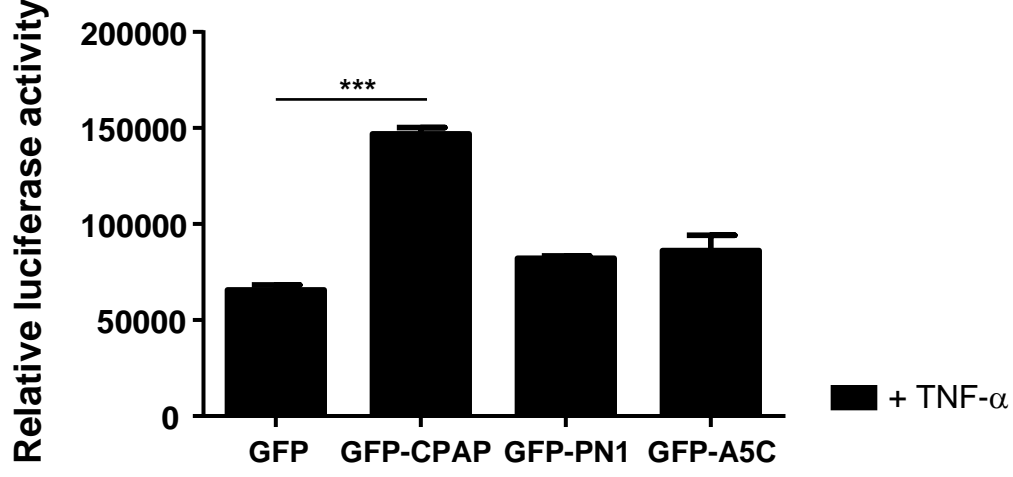

# Supplementary Figure S15

(A)

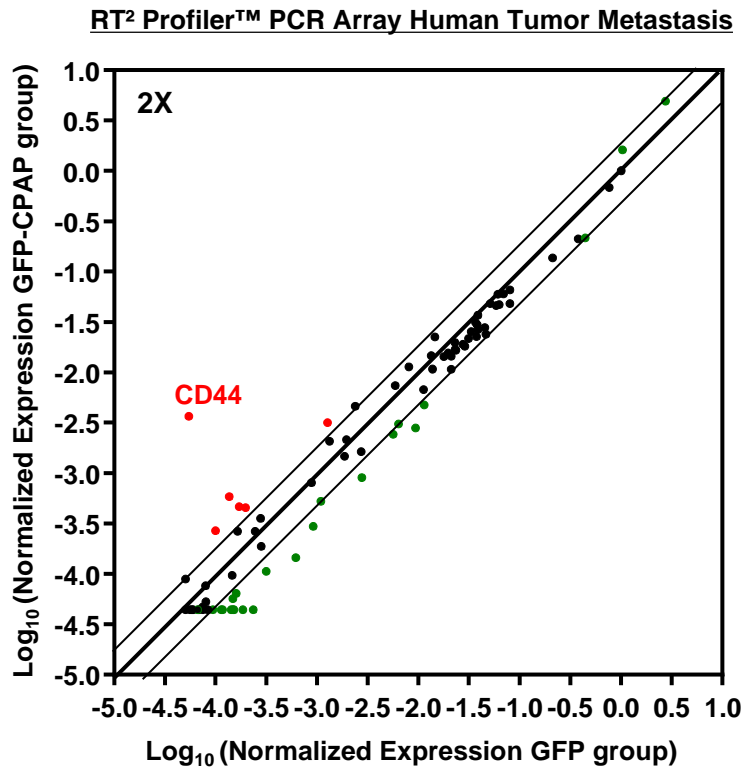

(B)

| Genes Upregulated in GFP-CPAP vs. GFP |                                                   |             |         |
|---------------------------------------|---------------------------------------------------|-------------|---------|
| Gene Symbol                           | Description                                       | Fold change | p-value |
| CD44                                  | CD44 molecule (Indian blood group)                | 67.3373     | 0.035   |
| PLAUR                                 | Plasminogen activator, urokinase receptor         | 4.2772      | 0.011   |
| IL18                                  | Interleukin 18 (interferon-gamma-inducing factor) | 2.7195      | 0.296   |
| MCAM                                  | Melanoma cell adhesion molecule                   | 2.6882      | 0.477   |
| CDH1                                  | Cadherin 1, type 1, E-cadherin (epithelial)       | 2.5082      | 0.041   |
| HPSE                                  | Heparanase                                        | 2.2974      | 0.658   |
